# Supplementary material
Source: PubMed Central journal article supplement (PMC11028133)
Supplement: 262_2019_2416_MOESM1_ESM.pdf [file 262_2019_2416_MOESM1_ESM.pdf]

**Supplementary Table 1: Summary of studies investigating the role of the gut microbiome in ICI therapy**

| ICI Therapy                                                                      | Tumour                                            | Model       | Relevant Intestinal Microbes in Responders                                                                                                                                                                                                                         | Relevant Intestinal Microbes in Non-Responders            | Relevant Intestinal Microbes: Side effects                                                                                                    | Publication Author, Year and Reference |
|----------------------------------------------------------------------------------|---------------------------------------------------|-------------|--------------------------------------------------------------------------------------------------------------------------------------------------------------------------------------------------------------------------------------------------------------------|-----------------------------------------------------------|-----------------------------------------------------------------------------------------------------------------------------------------------|----------------------------------------|
| Anti-PD-L1 mAbs                                                                  | Melanoma                                          | Mouse       | <i>Bifidobacterium breve</i> ,<br><i>Bifidobacterium longum</i>                                                                                                                                                                                                    |                                                           |                                                                                                                                               | Sivan, 2015<br>PMID: 26541606          |
| Anti-CTLA-4 mAbs (ipilimumab)                                                    | Melanoma, MM, NSCLC                               | Mouse       | <i>Bacteroides thetaiotamicron</i> ,<br><i>Bacteroides fragilis</i> ,<br><i>Burkholderiales</i>                                                                                                                                                                    |                                                           | Reduced Colitis:<br><i>Bacteroides fragilis</i> ,<br><i>Burkholderia cepacia</i>                                                              | Vétizou, 2015 [77]                     |
| Anti-CTLA-4 mAbs (ipilimumab) and/or anti-PD-1 (nivolumab) mAbs                  | Melanoma                                          | Human       | Firmicutes phylum:<br>Ruminococcus and Lachnospiraceae genus (relatives of <i>Faecalibacterium prausnitzii</i> L2-6, <i>Gemmiger formicilis</i> , butyrate-producing bacterium L2-21)                                                                              | <i>Bacteroides</i>                                        | Induced Colitis: Firmicutes ( <i>Faecalibacterium prausnitzii</i> , <i>Gemmiger formicilis</i> )<br><br>Reduced colitis: <i>Bacteroidetes</i> | Chaput, 2017<br>PMID: 28368458         |
| Anti-CTLA-4 mAbs (ipilimumab) and/or anti-PD-1 (nivolumab or pembrolizumab) mAbs | Melanoma                                          | Human       | <i>Faecalibacterium prausnitzii</i> ,<br><i>Bacteroides thetaiotamicron</i> ,<br><i>Holdemania filiformis</i> , <i>Dorea formicogenerans</i> ,<br><i>Bacteroides caccae</i>                                                                                        |                                                           |                                                                                                                                               | Frankel, 2017 [76]                     |
| Anti-PD-1 or anti-PD-L1 mAbs                                                     | NSCLC, renal cell carcinoma, urothelial carcinoma | Human/mouse | <i>Akkermansia muciniphilia</i> ,<br><i>Alistipes indistinctus</i>                                                                                                                                                                                                 |                                                           |                                                                                                                                               | Routy, 2018 [75]                       |
| Anti-PD-1 or anti-CTLA-4 mAbs                                                    | Melanoma                                          | Human/mouse | <i>Enterococcus faecium</i> ,<br><i>Collinsella aerofaciens</i> ,<br><i>Bifidobacterium adolescentis</i> , <i>Klebsiella pneumoniae</i> , <i>Veillonella parvula</i> , <i>Parabacteroides merdae</i> , <i>Lactobacillus sp.</i> ,<br><i>Bifidobacterium longum</i> | <i>Ruminococcus obeum</i> , <i>Roseburia intestinalis</i> |                                                                                                                                               | Matson, 2018<br>PMID: 29302014         |
| Anti-PD-1 (pembrolizumab) mAbs                                                   | Melanoma                                          | Human/mouse | <i>Ruminococcaceae</i>                                                                                                                                                                                                                                             | <i>Bacteriodales</i>                                      |                                                                                                                                               | Gopalakrishnan, 2018<br>PMID: 29097493 |
